# Supplementary material for: Understanding the Influence of a Bifunctional Polyethylene Glycol Derivative in Protein Corona Formation around Iron Oxide Nanoparticles
Source: PubMed Central journal article supplement (PMC6678275; doi:10.3390/ma12142218), 2019-07-10
Supplement: materials-12-02218-s001.pdf [file materials-12-02218-s001.pdf]

Supplementary Materials

# Understanding the Influence of a Bifunctional Polyethylene Glycol Derivative in Protein Corona Formation around Iron Oxide Nanoparticles

Amalia Ruiz <sup>1,\*†</sup>, Adán Alpizar <sup>2</sup>, Lilianne Beola <sup>3</sup>, Carmen Rubio <sup>4</sup>, Helena Gavilán <sup>5</sup>,  
Marzia Marciello <sup>5,6</sup>, Ildefonso Rodríguez-Ramiro <sup>7</sup>, Sergio Ciordia <sup>2</sup>, Christopher J. Morris <sup>1</sup> and  
María del Puerto Morales <sup>5,\*</sup>

<sup>1</sup> School of Pharmacy, University of East Anglia, Norwich Research Park, NR4 7TJ Norwich, UK.

<sup>2</sup> Centro Nacional de Biotecnología (CNB)/CSIC, Darwin, 3, 28049 Madrid, Spain.

<sup>3</sup> Instituto de Ciencia de Materiales de Aragón (ICMA), CSIC/Universidad de Zaragoza, C/Pedro Cerbuna 12, 50009 Zaragoza, Spain.

<sup>4</sup> Centro de Biología Molecular "Severo Ochoa" (CBMSO)/UAM-CSIC, Nicolás Cabrera, 1, 28049 Madrid, Spain.

<sup>5</sup> Instituto de Ciencia de Materiales de Madrid (ICMM)/CSIC, Sor Juana Inés de la Cruz 3, Cantoblanco, 28049 Madrid, Spain

<sup>6</sup> Faculty of Pharmacy, Complutense University of Madrid (UCM), Plaza Ramón y Cajal s/n, 28040 Madrid, Spain.

<sup>7</sup> School of Medicine, University of East Anglia, Norwich Research Park, NR4 7TJ Norwich, UK

\* Correspondence: G.RuizEstrada@qub.ac.uk (A.R.); puerto@icmm.csic.es (M.P.M.)

† Present address: School of Pharmacy, Queen's University Belfast, 97 Lisburn Rd, Belfast BT9 7BL, UK

Table S1. Proteins identified in the soft corona of the nanoparticles after the elution with buffer 50 mM HEPES 0.1% OGP, although proteins detected with only one peptide have to be considered at the limits of reliability.

| Protein                       | NP-DMSA            |                        |                       | NP-PEG-(NH <sub>2</sub> ) <sub>2</sub> (2000) |                        |                       |
|-------------------------------|--------------------|------------------------|-----------------------|-----------------------------------------------|------------------------|-----------------------|
|                               | Score <sup>1</sup> | Num. Pept <sup>2</sup> | Coverage <sup>3</sup> | Score <sup>1</sup>                            | Num. Pept <sup>2</sup> | Coverage <sup>3</sup> |
| Complement C3                 | 6727.39            | 109                    | 63.7                  | 8206.05                                       | 125                    | 67                    |
| Alpha-1-inhibitor 3           | 7953.42            | 113                    | 54                    | 8981.66                                       | 125                    | 62.6                  |
| Murinoglobulin-1              | 7468.93            | 106                    | 55.1                  | 8099.95                                       | 114                    | 59.1                  |
| Alpha-1-macroglobulin         | 7077.54            | 105                    | 69.3                  | 7902.6                                        | 113                    | 70.5                  |
| Serum albumin                 | 5344.66            | 83                     | 78.9                  | 6766.94                                       | 102                    | 84.2                  |
| Murinoglobulin-2              | 5215.35            | 75                     | 38.7                  | 6038.86                                       | 87                     | 49.4                  |
| Complement C4                 | 3914.24            | 65                     | 52.6                  | 5030.55                                       | 77                     | 55.8                  |
| Serotransferrin               | 3426.83            | 52                     | 61.7                  | 4157.15                                       | 61                     | 62.6                  |
| Ceruloplasmin                 | 2711.08            | 46                     | 48.4                  | 2903.29                                       | 48                     | 56.8                  |
| Serine protease inhibitor A3L | 2226.83            | 34                     | 67.6                  | 2713.15                                       | 37                     | 67.1                  |
| Hemopexin                     | 2094.57            | 35                     | 60.2                  | 2394.4                                        | 36                     | 60.2                  |
| Alpha-1-antiproteinase        | 1889.01            | 29                     | 53.3                  | 2233.93                                       | 33                     | 55.5                  |
| Plasminogen                   | 1430.96            | 24                     | 37.6                  | 2007.56                                       | 33                     | 40.8                  |
| Serine protease inhibitor A3K | 2195.32            | 32                     | 58.9                  | 2436.74                                       | 32                     | 58.7                  |
| Apolipoprotein A-I            | 1869.59            | 31                     | 69.5                  | 2023.03                                       | 30                     | 70.3                  |
| Ig gamma-2A chain C region    | 2004.15            | 32                     | 74.8                  | 2072.88                                       | 30                     | 78                    |
| Apolipoprotein A-IV           | 1679.47            | 25                     | 70.6                  | 1825.51                                       | 29                     | 75.4                  |
| Vitamin D-binding protein     | 1771.7             | 25                     | 45.4                  | 1991.24                                       | 28                     | 45.6                  |
| Serine protease inhibitor A3N | 1464.47            | 23                     | 52.9                  | 1917.66                                       | 28                     | 62                    |

|                                              |         |    |      |         |    |      |
|----------------------------------------------|---------|----|------|---------|----|------|
| Afamin                                       | 1339.87 | 24 | 44.4 | 1549.1  | 27 | 44.1 |
| Inter-alpha-trypsin inhibitor heavy chain H3 | 1432.98 | 24 | 26.8 | 1825.36 | 27 | 33.4 |
| Gelsolin                                     | 932.96  | 17 | 27.8 | 1723.05 | 27 | 40.4 |
| Fibronectin                                  | 1121.64 | 23 | 14.9 | 1532.53 | 26 | 17.4 |
| Prothrombin                                  | 1230.14 | 22 | 41.8 | 1701.54 | 26 | 45.1 |
| Apolipoprotein E                             | 1379.82 | 21 | 59.9 | 1696.13 | 25 | 60.9 |
| Apolipoprotein B-100                         | 332.13  | 8  | 2.5  | 963.22  | 25 | 7.5  |
| T-kininogen 1                                | 1484.3  | 22 | 41.4 | 1603.63 | 24 | 41.4 |
| Haptoglobin                                  | 1408.39 | 24 | 48.1 | 1501.84 | 24 | 48.1 |
| T-kininogen 2                                | 1262.76 | 20 | 45.8 | 1381.26 | 23 | 47.7 |
| Plasma kallikrein                            | 1055.78 | 18 | 33.4 | 1274.59 | 22 | 39.5 |
| Complement component C9                      | 1041.6  | 19 | 35.7 | 1182.51 | 21 | 37.2 |
| Plasma protease C1 inhibitor                 | 1155.63 | 16 | 39.1 | 1464.75 | 21 | 50   |
| Histidine-rich glycoprotein                  | 1065.86 | 19 | 44   | 1309.38 | 21 | 45.5 |
| Ig gamma-1 chain C region                    | 866.29  | 14 | 36.8 | 1269.67 | 20 | 62.6 |
| Hemoglobin subunit beta-1                    | 1153.46 | 19 | 85.7 | 1230.29 | 18 | 84.4 |
| Kininogen-1                                  | 984.8   | 16 | 25.4 | 1198.93 | 18 | 28.2 |
| Carboxylesterase 1C                          | 1042.31 | 16 | 43   | 1250.95 | 18 | 43   |
| Hemoglobin subunit beta-2                    | 1090.93 | 18 | 84.4 | 1139.65 | 16 | 83   |
| Serine protease inhibitor A3M (Fragment)     | 1090.65 | 17 | 50.5 | 1032.07 | 16 | 43   |
| Alpha-2-HS-glycoprotein                      | 1138.08 | 15 | 61.1 | 1104.31 | 15 | 48.3 |
| Clusterin                                    | 666.28  | 12 | 30.6 | 906.66  | 14 | 29.3 |
| Ig kappa chain C region, B allele            | 862.28  | 11 | 81.1 | 994.1   | 12 | 73.6 |
| Hemoglobin subunit alpha-1/2                 | 848.57  | 12 | 66.2 | 893.73  | 12 | 66.2 |
| Fetuin-B                                     | 686.33  | 11 | 31   | 759.43  | 12 | 23.5 |
| Transthyretin                                | 748.29  | 11 | 67.3 | 812.26  | 11 | 71.4 |

|                                                                        |        |    |      |        |    |      |
|------------------------------------------------------------------------|--------|----|------|--------|----|------|
| Ig gamma-2B chain C region                                             | 749.34 | 12 | 55.3 | 873.5  | 11 | 40.8 |
| C4b-binding protein alpha chain                                        | 405.66 | 10 | 21.5 | 469.41 | 11 | 22.4 |
| Heparin cofactor 2                                                     | 507.02 | 9  | 23.2 | 614.39 | 11 | 23.6 |
| Complement factor I                                                    | 478.84 | 9  | 20.7 | 594.73 | 11 | 20.2 |
| Angiotensinogen                                                        | 449.63 | 7  | 23.7 | 694.43 | 10 | 31.9 |
| C-reactive protein                                                     | 396.17 | 5  | 21.7 | 692.32 | 10 | 55.7 |
| Serum paraoxonase/arylesterase 1                                       | 495.13 | 8  | 37.5 | 687.66 | 10 | 40.6 |
| Complement component C8 beta chain                                     | 255.34 | 6  | 11   | 422.12 | 10 | 19.7 |
| Keratin, type I cytoskeletal 10                                        | 314.38 | 6  | 9.1  | 566.77 | 10 | 15   |
| Ig kappa chain C region, A allele                                      | 562.59 | 8  | 44.3 | 617.73 | 9  | 44.3 |
| Serum amyloid P-component                                              | 382.18 | 7  | 44.3 | 667.05 | 9  | 47.8 |
| Beta-2-glycoprotein 1                                                  | 420.97 | 7  | 24.6 | 492.87 | 9  | 37.4 |
| Corticosteroid-binding globulin                                        | 609.09 | 10 | 24.5 | 533.91 | 9  | 24.5 |
| Protein Z-dependent protease inhibitor                                 | 220.86 | 3  | 12.4 | 605.49 | 9  | 33.3 |
| Phosphatidylinositol-glycan-specific phospholipase D                   | 406.83 | 7  | 10.9 | 432.8  | 9  | 15.4 |
| Coagulation factor XII                                                 | 221.91 | 4  | 10.4 | 416.96 | 8  | 16.1 |
| Ig gamma-2C chain C                                                    | 395.85 | 8  | 24.9 | 467.26 | 8  | 28.6 |
| Ig lambda-2 chain C                                                    | 424.97 | 7  | 72.1 | 454.76 | 7  | 72.1 |
| Insulin-like growth factor-binding protein complex acid labile subunit | 165.28 | 3  | 7.3  | 337.22 | 7  | 17.1 |
| Keratin, type II cytoskeletal 1                                        | 205.68 | 4  | 7    | 444.63 | 7  | 8.3  |
| Alpha-1-acid glycoprotein                                              | 143.53 | 4  | 12.7 | 287.16 | 6  | 27.8 |
| Retinol-binding protein 4                                              | 267.81 | 5  | 34.3 | 335.41 | 6  | 39.3 |
| Alpha-2-macroglobulin                                                  | 276.62 | 4  | 2.1  | 387.51 | 6  | 3.7  |
| Zinc-alpha-2-glycoprotein                                              | 179.41 | 4  | 23.3 | 297.05 | 6  | 24.3 |
| Alpha-1B-glycoprotein                                                  | 226.34 | 5  | 9.9  | 275.13 | 6  | 11.3 |

|                                            |        |    |      |        |   |      |
|--------------------------------------------|--------|----|------|--------|---|------|
| Carboxypeptidase N catalytic chain         | 138.35 | 3  | 10.5 | 215.74 | 6 | 20.6 |
| Carboxypeptidase B2                        | 68.73  | 2  | 9.2  | 289.63 | 6 | 23   |
| Glutathione peroxidase 3                   | 294.8  | 6  | 28.3 | 346.68 | 5 | 31.9 |
| Actin, cytoplasmic 1                       | 288.62 | 7  | 27.2 | 245.14 | 5 | 16.8 |
| Protein AMBP                               | 124.03 | 2  | 6.3  | 282.95 | 5 | 16.9 |
| Apolipoprotein A-II                        | 91.09  | 2  | 19.6 | 247.94 | 4 | 49   |
| Complement factor D                        | 71.45  | 1  | 5.7  | 268.46 | 4 | 25.9 |
| Keratin, type II cytoskeletal 6A           | 76.21  | 1  | 2.2  | 210.01 | 4 | 6.9  |
| Extracellular matrix protein 1             | 86.9   | 2  | 4.4  | 231.1  | 4 | 9.1  |
| Coagulation factor X                       | 81.97  | 2  | 6.6  | 171.47 | 4 | 10.8 |
| Carboxypeptidase Q                         | 58.24  | 1  | 2.3  | 205.27 | 4 | 11.9 |
| Complement component C6                    | 158.26 | 4  | 6.9  | 154.94 | 4 | 6.2  |
| Major urinary protein                      | 94.16  | 2  | 13.3 | 114.31 | 3 | 17.7 |
| Beta-2-microglobulin                       | 149.37 | 3  | 26.1 | 183.82 | 3 | 26.1 |
| Phosphatidylcholine-sterol acyltransferase | 23.19  | 1  | 3.9  | 106.27 | 3 | 7    |
| Apolipoprotein C-I                         | 167.53 | 3  | 22.7 | 189.53 | 3 | 22.7 |
| Mannose-binding protein A                  | 26.7   | 1  | 2.9  | 162.36 | 3 | 10.9 |
| Selenoprotein P                            | --     | -- | --   | 125.38 | 3 | 8.6  |
| Complement C1q subcomponent subunit A      | --     | -- | --   | 89.29  | 3 | 15.9 |
| Apolipoprotein C-IV                        | 186.54 | 4  | 32.3 | 171.24 | 3 | 25   |
| Carboxylesterase 1E                        | --     | -- | --   | 145.31 | 3 | 11.4 |
| Neuronal PAS domain-containing protein 4   | --     | -- | --   | 71.24  | 3 | 4.1  |
| Leukemia inhibitory factor receptor        | 41.15  | 1  | 0.9  | 65     | 2 | 1.6  |
| Ig heavy chain V region IR2                | --     | -- | --   | 145.71 | 2 | 17.6 |
| Glyceraldehyde-3-phosphate dehydrogenase   | --     | -- | --   | 65.74  | 2 | 10.8 |
| Platelet factor 4                          | 108.86 | 2  | 21.9 | 138.46 | 2 | 21.9 |

|                                                                |       |    |      |        |   |      |
|----------------------------------------------------------------|-------|----|------|--------|---|------|
| Apolipoprotein M                                               | 76.03 | 2  | 14.7 | 54.04  | 2 | 14.7 |
| Carbonic anhydrase 2                                           | 35.2  | 1  | 3.8  | 60.72  | 2 | 11.2 |
| Vitamin K-dependent protein S                                  | 45.22 | 1  | 2.2  | 88.9   | 2 | 4.1  |
| Keratin, type I cytoskeletal 15                                | --    | -- | --   | 104.4  | 2 | 3.6  |
| Keratin, type II cytoskeletal 2 epidermal                      | 28.47 | 1  | 1.3  | 104.27 | 2 | 3.4  |
| Attractin                                                      | 59.87 | 2  | 2    | 50.39  | 2 | 2.7  |
| Embryonic polyadenylate-binding protein 2                      | --    | -- | --   | 20.41  | 1 | 3.7  |
| Failed axon connections homolog                                | --    | -- | --   | 21.49  | 1 | 1.7  |
| Microtubule-actin cross-linking factor 1                       | --    | -- | --   | 23.23  | 1 | 0.5  |
| Serine/threonine-protein kinase 10                             | --    | -- | --   | 28.55  | 1 | 1.1  |
| Cell division cycle 5-like protein                             | 21.35 | 1  | 1.1  | 21.94  | 1 | 1.1  |
| Ribonuclease 4                                                 | --    | -- | --   | 68.52  | 1 | 8.8  |
| Cadherin EGF LAG seven-pass G-type receptor 3                  | --    | -- | --   | 24.68  | 1 | 0.2  |
| Fibrinogen alpha chain                                         | --    | -- | --   | 105.62 | 1 | 2    |
| Receptor tyrosine-protein kinase erbB-2                        | 21.36 | 1  | 1.1  | 28.11  | 1 | 1.1  |
| Annexin A1                                                     | --    | -- | --   | 22.52  | 1 | 2    |
| Cationic trypsin-3                                             | 56.62 | 1  | 3.2  | 37.1   | 1 | 3.2  |
| Protein kinase C delta type                                    | --    | -- | --   | 27.7   | 1 | 1.2  |
| A-kinase anchor protein SPHKAP                                 | 22.02 | 1  | 0.5  | 22.5   | 1 | 0.5  |
| cAMP-dependent protein kinase type II-alpha regulatory subunit | --    | -- | --   | 30.86  | 1 | 2.5  |
| Myosin-3                                                       | --    | -- | --   | 21.81  | 1 | 0.5  |
| Insulin-like growth factor-binding protein 3                   | --    | -- | --   | 65.57  | 1 | 2.7  |
| Class I histocompatibility antigen, Non-RT1.A alpha-1 chain    | --    | -- | --   | 20.38  | 1 | 4.1  |
| Coagulation factor IX (Fragment)                               | 98.95 | 2  | 6    | 55.39  | 1 | 3.2  |
| Proteasome subunit alpha type-1                                | --    | -- | --   | 20.9   | 1 | 2.7  |

|                                                                |       |    |      |       |   |     |
|----------------------------------------------------------------|-------|----|------|-------|---|-----|
| Band 3 anion transport protein                                 | --    | -- | --   | 52.07 | 1 | 2   |
| Plectin                                                        | --    | -- | --   | 20.12 | 1 | 0.2 |
| Sodium-dependent serotonin transporter                         | 25.36 | 1  | 1.1  | 21.07 | 1 | 1.1 |
| Complement C1q subcomponent subunit B                          | 184.8 | 4  | 18.6 | 88.44 | 1 | 4.7 |
| Complement C1q subcomponent subunit C                          | --    | -- | --   | 58.73 | 1 | 4.1 |
| Microtubule-associated protein 1A                              | --    | -- | --   | 24.72 | 1 | 0.3 |
| Signal peptidase complex catalytic subunit SEC11A              | --    | -- | --   | 23.15 | 1 | 3.9 |
| Metalloproteinase inhibitor 3                                  | --    | -- | --   | 68.02 | 1 | 5.7 |
| Nuclear pore complex protein Nup153                            | 26.64 | 1  | 0.6  | 23.08 | 1 | 0.6 |
| Lumican                                                        | 51.57 | 1  | 3.3  | 41.45 | 1 | 3.3 |
| Inactive pancreatic lipase-related protein 1                   | --    | -- | --   | 27.02 | 1 | 1.5 |
| Tropomyosin beta chain                                         | --    | -- | --   | 34.02 | 1 | 3.9 |
| Pannexin-1                                                     | 49.1  | 1  | 1.6  | 32.1  | 1 | 1.6 |
| 40S ribosomal protein S13                                      | --    | -- | --   | 20.1  | 1 | 4.6 |
| Adenomatous polyposis coli protein                             | 22.83 | 1  | 0.2  | 21.32 | 1 | 0.2 |
| Activin receptor type-1                                        | --    | -- | --   | 22.7  | 1 | 1.4 |
| Lipid phosphate phosphohydrolase 3                             | --    | -- | --   | 20.38 | 1 | 2.2 |
| Unconventional myosin-Ib                                       | --    | -- | --   | 22.3  | 1 | 0.6 |
| Extracellular superoxide dismutase [Cu-Zn]                     | --    | -- | --   | 74.49 | 1 | 6.6 |
| Enoyl-CoA hydratase domain-containing protein 3, mitochondrial | 37.94 | 1  | 2.3  | 38.2  | 1 | 2.3 |
| Charged multivesicular body protein 5                          | 20.9  | 1  | 4.6  | 21.61 | 1 | 4.6 |
| RNA polymerase II-associated factor 1 homolog                  | --    | -- | --   | 23.94 | 1 | 2.6 |
| Leucine-rich repeat-containing protein 63                      | 29.92 | 1  | 1.2  | 28.19 | 1 | 1.2 |
| Zinc finger RNA-binding protein                                | --    | -- | --   | 25.32 | 1 | 0.8 |
| Zinc finger and BTB domain-containing protein 38               | --    | -- | --   | 27.16 | 1 | 0.7 |

|                                                            |       |    |     |       |    |     |
|------------------------------------------------------------|-------|----|-----|-------|----|-----|
| Biotinidase                                                | --    | -- | --  | 34.88 | 1  | 2.5 |
| Signal-induced proliferation-associated 1-like protein 2   | 22.03 | 1  | 0.4 | 22.31 | 1  | 0.4 |
| Transmembrane protease serine 11G                          | --    | -- | --  | 21.64 | 1  | 1.7 |
| Zinc finger protein DZIP1L                                 | --    | -- | --  | 20.83 | 1  | 1.7 |
| Calcium-dependent secretion activator 1                    | --    | -- | --  | 20.29 | 1  | 1   |
| Non-muscle caldesmon                                       | 21.58 | 1  | 1.3 | 29.49 | 1  | 1.3 |
| Dual specificity mitogen-activated protein kinase kinase 5 | 44.81 | 1  | 1.6 | 41.97 | 1  | 1.6 |
| Eukaryotic translation initiation factor 2-alpha kinase 1  | 24.22 | 1  | 1.1 | 24.14 | 1  | 1.1 |
| Lipopolysaccharide-binding protein                         | --    | -- | --  | 37.22 | 1  | 2.3 |
| Interleukin-1 receptor accessory protein                   | 74.55 | 2  | 4   | 47.7  | 1  | 2.3 |
| Secernin-1                                                 | 20.29 | 1  | 1.9 | 23.09 | 1  | 1.9 |
| Signal recognition particle 54 kDa protein                 | --    | -- | --  | 29.01 | 1  | 1.4 |
| Keratin, type II cytoskeletal 4                            | --    | -- | --  | 39.85 | 1  | 3   |
| Complement C1s subcomponent                                | --    | -- | --  | 48.18 | 1  | 1   |
| SUN domain-containing ossification factor                  | --    | -- | --  | 42.57 | 1  | 0.7 |
| ATP-binding cassette sub-family A member 7                 | 26.44 | 1  | 0.4 | 32.49 | 1  | 0.4 |
| Serpin A11                                                 | --    | -- | --  | 29.26 | 1  | 2.6 |
| Calsyntenin-3                                              | --    | -- | --  | 20.55 | 1  | 0.8 |
| Apoptotic protease-activating factor 1                     | 28.14 | 1  | 0.9 | 26.95 | 1  | 0.9 |
| Intraflagellar transport protein 172 homolog               | 30.95 | 1  | 0.7 | 34.41 | 1  | 0.7 |
| Vesicle-fusing ATPase                                      | 28.5  | 1  | 1.2 | 25.82 | 1  | 1.2 |
| Carbonic anhydrase 1                                       | 57.13 | 1  | 3.8 | --    | -- | --  |
| Cation channel sperm-associated protein subunit delta      | 22.87 | 1  | 1.1 | --    | -- | --  |
| Chromodomain-helicase-DNA-binding protein 6                | 52.82 | 2  | 0.3 | --    | -- | --  |
| Sentrin-specific protease 7                                | 23.75 | 1  | 0.8 | --    | -- | --  |
| Cytochrome P450 2F2                                        | 20.27 | 1  | 2.4 | --    | -- | --  |



|                                                           |       |   |      |    |    |    |
|-----------------------------------------------------------|-------|---|------|----|----|----|
| Calpain-9                                                 | 20.89 | 1 | 1.2  | -- | -- | -- |
| Dipeptidyl peptidase 3                                    | 23.01 | 1 | 1.2  | -- | -- | -- |
| Calpain-6                                                 | 21.19 | 1 | 1.2  | -- | -- | -- |
| Apolipoprotein C-III                                      | 25.49 | 1 | 29.7 | -- | -- | -- |
| Complement C5 (Fragment)                                  | 37.79 | 1 | 10.4 | -- | -- | -- |
| Mesencephalic astrocyte-derived neurotrophic factor       | 20.31 | 1 | 4.5  | -- | -- | -- |
| 60S ribosomal protein L13                                 | 22.77 | 1 | 4.3  | -- | -- | -- |
| Nucleolar and coiled-body phosphoprotein 1                | 24.08 | 1 | 1.3  | -- | -- | -- |
| Regulator of G-protein signaling 9                        | 22.39 | 1 | 1.2  | -- | -- | -- |
| Phospholipase A-2-activating protein                      | 28.8  | 1 | 1    | -- | -- | -- |
| Cerebellin-1                                              | 24.98 | 1 | 3.6  | -- | -- | -- |
| Adenosine deaminase domain-containing protein 1           | 23.02 | 1 | 1.8  | -- | -- | -- |
| Importin subunit alpha-6                                  | 20.07 | 1 | 1.3  | -- | -- | -- |
| Exocyst complex component 3                               | 23.63 | 1 | 1.5  | -- | -- | -- |
| Muscle, skeletal receptor tyrosine protein kinase         | 21.92 | 1 | 2    | -- | -- | -- |
| Golgi SNAP receptor complex member 1                      | 24.29 | 1 | 2.8  | -- | -- | -- |
| Gamma-glutamyltransferase 6                               | 23.67 | 1 | 1.6  | -- | -- | -- |
| Elongator complex protein 1                               | 41.85 | 1 | 0.5  | -- | -- | -- |
| Indoleamine 2,3-dioxygenase 1                             | 20.56 | 1 | 2.9  | -- | -- | -- |
| Glyceraldehyde-3-phosphate dehydrogenase, testis-specific | 47.53 | 1 | 3.2  | -- | -- | -- |
| Alpha-parvin                                              | 21.6  | 1 | 4    | -- | -- | -- |
| Regulator of G-protein signaling 2                        | 20.78 | 1 | 6.2  | -- | -- | -- |
| Cyclin-L1                                                 | 21.6  | 1 | 2.1  | -- | -- | -- |
| Structural maintenance of chromosomes protein 1A          | 21.55 | 1 | 0.6  | -- | -- | -- |

---

<sup>1</sup> Score: number which reflects the combined scores of all observed mass spectra that can be matched to amino acid sequences within that protein. A higher score indicates a more confident match.

<sup>2</sup> Num. Pept: Number of peptides detected for each protein identified.

<sup>3</sup> Coverage: Percentage of the database protein sequence covered by matching peptide.

**Table S2.** Proteins identified in the hard corona of the nanoparticles after the elution with buffer 100 mM NaAc 0.1% OGP pH 5, although proteins detected with only one peptide have to be considered at the limits of reliability.

| Protein               | NP-DMSA            |                        |                       | NP-PEG-(NH <sub>2</sub> ) <sub>2</sub> (2000) |                        |                       |
|-----------------------|--------------------|------------------------|-----------------------|-----------------------------------------------|------------------------|-----------------------|
|                       | Score <sup>1</sup> | Num. Pept <sup>2</sup> | Coverage <sup>3</sup> | Score <sup>1</sup>                            | Num. Pept <sup>2</sup> | Coverage <sup>3</sup> |
| Alpha-1-inhibitor 3   | 6811.66            | 104                    | 51.2                  | 5886.15                                       | 90                     | 42.5                  |
| Murinoglobulin-1      | 6297.03            | 98                     | 50.6                  | 5203.87                                       | 81                     | 41                    |
| Complement C3         | 6681.66            | 105                    | 59.6                  | 5169.88                                       | 81                     | 44.2                  |
| Serum albumin         | 4960.14            | 77                     | 70.6                  | 4941.58                                       | 74                     | 65                    |
| Alpha-1-macroglobulin | 6562.77            | 98                     | 59.5                  | 4622.58                                       | 70                     | 41.9                  |
| Serotransferrin       | 4210.72            | 63                     | 62                    | 4160.3                                        | 65                     | 52.3                  |
| Plasminogen           | 3174.39            | 53                     | 50.6                  | 3824.04                                       | 63                     | 52.2                  |
| Murinoglobulin-2      | 4323.68            | 71                     | 37.8                  | 3740.35                                       | 59                     | 30.4                  |
| Complement C4         | 4224.92            | 68                     | 43.9                  | 3313.64                                       | 55                     | 34                    |
| Apolipoprotein E      | 1806.58            | 30                     | 68.6                  | 2290.45                                       | 38                     | 63.8                  |
| Ceruloplasmin         | 2297.77            | 38                     | 37.3                  | 2041.18                                       | 35                     | 32                    |
| Gelsolin              | 1627.23            | 28                     | 44.5                  | 2018.46                                       | 32                     | 39.6                  |
| Ig gamma-2A chain C   | 1826.64            | 30                     | 78.6                  | 1865.9                                        | 29                     | 60.2                  |
| Prothrombin           | 1842.44            | 31                     | 46                    | 1797.2                                        | 27                     | 39.5                  |

|                                   |         |    |      |         |    |      |
|-----------------------------------|---------|----|------|---------|----|------|
| Hemopexin                         | 2202.86 | 38 | 59.6 | 1766.03 | 30 | 53.3 |
| Plasma kallikrein                 | 1128.43 | 19 | 29.9 | 1641.17 | 27 | 38.1 |
| Apolipoprotein A-I                | 1994.88 | 35 | 71.8 | 1589.25 | 27 | 71   |
| Alpha-1-antiproteinase            | 1918.41 | 30 | 56.4 | 1464.36 | 21 | 50.1 |
| Serine protease inhibitor A3L     | 2020.66 | 32 | 60.5 | 1434.09 | 23 | 48.7 |
| Haptoglobin                       | 1619.4  | 26 | 46.4 | 1388.32 | 22 | 48.4 |
| Vitamin D-binding protein         | 1697.63 | 25 | 45.6 | 1374.47 | 21 | 26.5 |
| Keratin, type II cytoskeletal 5   | 837.78  | 17 | 22.4 | 1304.89 | 23 | 23.8 |
| Plasma protease C1 inhibitor      | 1166.67 | 19 | 44.8 | 1274.7  | 20 | 38.7 |
| Afamin                            | 1380.53 | 26 | 36.2 | 1250.79 | 22 | 34.9 |
| Ig kappa chain C region, B allele | 1099.65 | 13 | 49.1 | 1225.27 | 14 | 56.6 |
| T-kininogen 1                     | 1409.3  | 22 | 40.5 | 1209.89 | 19 | 40.2 |
| T-kininogen 2                     | 1284.89 | 21 | 39.3 | 1156.73 | 18 | 39.1 |
| Apolipoprotein A-IV               | 1490.72 | 25 | 65.7 | 1146.35 | 17 | 53.5 |
| Keratin, type I cytoskeletal 10   | 1165.01 | 18 | 18.1 | 1125.03 | 16 | 18.3 |
| Clusterin                         | 1051.34 | 17 | 30.2 | 1068.36 | 17 | 34.7 |
| Alpha-2-HS-glycoprotein           | 1017.69 | 15 | 46.6 | 1060.52 | 14 | 37.8 |
| Serine protease inhibitor A3N     | 1260.76 | 23 | 54.5 | 1051.07 | 19 | 41.6 |
| Serine protease inhibitor A3K     | 1578.19 | 23 | 51.2 | 1032.24 | 14 | 29.3 |
| Ig gamma-2C chain C               | 887.19  | 15 | 36.5 | 999.59  | 17 | 36.5 |
| Ig gamma-1 chain C                | 820.86  | 13 | 36.8 | 964.11  | 14 | 37.4 |
| Hemoglobin subunit beta-1         | 894.71  | 13 | 74.8 | 956.58  | 16 | 85.7 |
| Histidine-rich glycoprotein       | 1109.4  | 20 | 43.6 | 941.67  | 17 | 29.5 |
| Kininogen-1                       | 858.43  | 16 | 23.6 | 915.74  | 15 | 20.7 |
| Keratin, type I cytoskeletal 17   | 551.28  | 10 | 17.8 | 906.79  | 16 | 25.6 |
| C4b-binding protein alpha chain   | 1030.5  | 21 | 34.9 | 887.05  | 18 | 34.9 |
| Hemoglobin subunit beta-2         | 740.05  | 12 | 73.5 | 871.66  | 14 | 84.4 |

|                                              |         |    |      |        |    |      |
|----------------------------------------------|---------|----|------|--------|----|------|
| Complement component C9                      | 908.87  | 16 | 31.8 | 870.47 | 18 | 30.5 |
| Ig gamma-2B chain C region                   | 846.84  | 12 | 40.8 | 846.47 | 12 | 30.6 |
| Inter-alpha-trypsin inhibitor heavy chain H3 | 1079.65 | 18 | 24   | 770.43 | 12 | 14.3 |
| Coagulation factor XII                       | 604.33  | 12 | 16.8 | 743.62 | 13 | 20.5 |
| Beta-2-glycoprotein 1                        | 678.51  | 13 | 42.8 | 743.5  | 14 | 44.8 |
| Keratin, type I cytoskeletal 14              | 551.23  | 10 | 17.3 | 741.35 | 12 | 20.4 |
| Extracellular matrix protein 1               | 340.37  | 7  | 19.6 | 732.71 | 12 | 30.2 |
| Keratin, type II cytoskeletal 1              | 608.98  | 10 | 9.1  | 729.45 | 13 | 10.1 |
| Transthyretin                                | 924.3   | 15 | 71.4 | 713.96 | 12 | 71.4 |
| Hemoglobin subunit alpha-1/2                 | 749.76  | 11 | 66.2 | 706.96 | 11 | 66.2 |
| Fetuin-B                                     | 663.6   | 10 | 23.5 | 647.79 | 9  | 18.8 |
| Serine protease inhibitor A3M (Fragment)     | 738.41  | 11 | 33.5 | 636.26 | 9  | 22.6 |
| Carboxylesterase 1C                          | 830.94  | 13 | 38.1 | 597.07 | 10 | 22.8 |
| Keratin, type II cytoskeletal 2 epidermal    | 416.93  | 8  | 8    | 595.19 | 12 | 6.6  |
| Ig kappa chain C region, A allele            | 680.22  | 10 | 76.4 | 582.47 | 9  | 51.9 |
| Keratin, type I cytoskeletal 15              | 451.33  | 7  | 10.3 | 565.06 | 9  | 10.5 |
| Complement factor I                          | 462.53  | 9  | 18.7 | 552.92 | 12 | 18.4 |
| Keratin, type I cytoskeletal 42              | 286.28  | 6  | 10.6 | 536.81 | 11 | 15.5 |
| Heparin cofactor 2                           | 242.23  | 6  | 9.4  | 526.75 | 11 | 22.3 |
| Ig lambda-2 chain C                          | 521.74  | 8  | 91.3 | 526.72 | 8  | 72.1 |
| Junction plakoglobin                         | 26.98   | 1  | 1.9  | 491.84 | 9  | 16.9 |
| Keratin, type I cytoskeletal 19              | 279.8   | 6  | 11.4 | 475.77 | 9  | 14.4 |
| Apolipoprotein C-I                           | 397.47  | 8  | 27.3 | 461.34 | 8  | 27.3 |
| Glutathione peroxidase 3                     | 394.75  | 7  | 35   | 456.69 | 8  | 35   |
| Carboxypeptidase N catalytic chain           | 709.26  | 12 | 35.7 | 432.67 | 8  | 25.6 |
| Keratin, type II cytoskeletal 75             | 463.93  | 9  | 11.4 | 427.83 | 8  | 9    |
| Complement component C8 beta chain           | 470.35  | 11 | 21.2 | 426.61 | 9  | 19.7 |

|                                       |        |    |      |        |   |      |
|---------------------------------------|--------|----|------|--------|---|------|
| Keratin, type II cytoskeletal 73      | 379.25 | 7  | 7.4  | 421.24 | 8 | 7.4  |
| Serum amyloid P-component             | 465.84 | 9  | 50.4 | 419.42 | 8 | 38.2 |
| Ribonuclease 4                        | 38.81  | 1  | 25.9 | 414.05 | 8 | 44.2 |
| Apolipoprotein C-IV                   | 304.14 | 5  | 32.3 | 398.11 | 7 | 32.3 |
| Angiotensinogen                       | 376.98 | 6  | 16.1 | 357.56 | 7 | 19.3 |
| Keratin, type II cytoskeletal 4       | 346.36 | 7  | 7.1  | 356.9  | 7 | 5    |
| Platelet factor 4                     | 182.2  | 3  | 22.9 | 349.19 | 5 | 38.1 |
| Metalloproteinase inhibitor 3         | 106.39 | 3  | 19.9 | 344.85 | 6 | 29.4 |
| Keratin, type I cytoskeletal 13       | 337.04 | 6  | 6.8  | 341.11 | 5 | 6.8  |
| Keratin, type II cytoskeletal 1b      | 234.3  | 4  | 6    | 325.78 | 6 | 8.3  |
| Keratin, type II cytoskeletal 6A      | 541.58 | 9  | 12   | 321.07 | 5 | 7.2  |
| Complement C1q subcomponent subunit B | 225.04 | 4  | 18.2 | 320.38 | 5 | 23.7 |
| Serum paraoxonase/arylesterase 1      | 197.74 | 3  | 17.2 | 295.71 | 5 | 13   |
| Keratin, type II cytoskeletal 8       | 301.96 | 6  | 9.9  | 291.44 | 6 | 9.9  |
| Lipopolysaccharide-binding protein    | 47.23  | 1  | 2.3  | 289.7  | 5 | 12.1 |
| Fibrinogen alpha chain                | 126.47 | 2  | 3.2  | 281.71 | 4 | 8.2  |
| Corticosteroid-binding globulin       | 358.05 | 7  | 22.5 | 273.46 | 6 | 14.6 |
| Actin, cytoplasmic 1                  | 183.53 | 3  | 9.9  | 235.28 | 5 | 15.5 |
| Carboxypeptidase B2                   | 113.4  | 3  | 7.1  | 219.1  | 6 | 12.6 |
| Vitamin K-dependent protein S         | 206.22 | 4  | 6.8  | 219.01 | 4 | 6.1  |
| Retinol-binding protein 4             | 165.77 | 4  | 19.9 | 209.07 | 4 | 19.9 |
| Glia-derived nexin                    | --     | -- | --   | 190.07 | 4 | 12.1 |
| Complement component C6               | 284.42 | 7  | 10   | 182.55 | 4 | 4.6  |
| Complement factor D                   | 123.28 | 3  | 18.3 | 180.53 | 3 | 18.3 |
| Complement C1q subcomponent subunit A | 94.94  | 2  | 7.8  | 173.84 | 4 | 13.9 |
| Complement C1s subcomponent           | 238.42 | 4  | 6.7  | 158.41 | 3 | 3.9  |
| Ig heavy chain V region IR2           | 46.21  | 1  | 6.3  | 150.67 | 3 | 17.6 |

|                                                                        |        |    |      |        |   |      |
|------------------------------------------------------------------------|--------|----|------|--------|---|------|
| Alpha-1-acid glycoprotein                                              | 126.41 | 3  | 8.8  | 147.14 | 4 | 15.6 |
| Alpha-1B-glycoprotein                                                  | 93.92  | 2  | 3.5  | 142.7  | 4 | 6.6  |
| Keratin, type II cytoskeletal 72                                       | --     | -- | --   | 139.44 | 3 | 5.8  |
| Histone H2A type 1-C                                                   | 55.88  | 1  | 14.6 | 135.78 | 2 | 21.5 |
| C-reactive protein                                                     | 340.02 | 5  | 21.7 | 133.41 | 2 | 8.7  |
| Keratin, type I cytoskeletal 20                                        | 101.39 | 2  | 4.7  | 130.52 | 2 | 4.7  |
| Beta-2-microglobulin                                                   | 112.7  | 2  | 19.3 | 121.93 | 2 | 19.3 |
| Apolipoprotein A-II                                                    | 140.95 | 2  | 17.6 | 119.59 | 2 | 17.6 |
| Glyceraldehyde-3-phosphate dehydrogenase                               | 105.7  | 2  | 11.7 | 118.57 | 3 | 12.9 |
| Histone H4                                                             | 35.31  | 1  | 7.8  | 116.77 | 2 | 21.4 |
| Protein AMBP                                                           | 160.98 | 4  | 10.3 | 108.32 | 3 | 8.9  |
| C4b-binding protein beta chain                                         | 108.18 | 2  | 7.4  | 107.6  | 2 | 7.4  |
| Insulin-like growth factor-binding protein complex acid labile subunit | 152.45 | 3  | 5.5  | 107.23 | 2 | 3.5  |
| Protein Z-dependent protease inhibitor                                 | 176.56 | 3  | 7.8  | 104.93 | 1 | 3.7  |
| Mannose-binding protein A                                              | 25.73  | 1  | 2.9  | 102.32 | 3 | 8.8  |
| Complement C1q subcomponent subunit C                                  | 74.73  | 2  | 7.8  | 99.8   | 2 | 7.8  |
| Procollagen C-endopeptidase enhancer 1                                 | --     | -- | --   | 99.14  | 1 | 3.6  |
| Insulin-like growth factor-binding protein 3                           | --     | -- | --   | 97.05  | 2 | 6.2  |
| Coagulation factor IX (Fragment)                                       | 144.23 | 3  | 9.9  | 96.3   | 2 | 6    |
| Cystatin-C                                                             | 60.51  | 1  | 12.1 | 87.88  | 1 | 12.1 |
| Ubiquitin-40S ribosomal protein S27a                                   | --     | -- | --   | 84.94  | 2 | 16   |
| Annexin A2                                                             | --     | -- | --   | 77.71  | 2 | 6.2  |
| Major urinary protein                                                  | 48.32  | 1  | 8.8  | 68.45  | 2 | 13.3 |
| Mannose-binding protein C                                              | 69.96  | 2  | 10.7 | 66.77  | 1 | 4.9  |
| Histone H3.1                                                           | --     | -- | --   | 63.17  | 2 | 10.3 |
| Phospholipase A1                                                       | 58     | 1  | 2.9  | 57.93  | 1 | 2.9  |

|                                                      |        |    |     |       |   |      |
|------------------------------------------------------|--------|----|-----|-------|---|------|
| Carboxypeptidase Q                                   | 51.54  | 1  | 1.9 | 57.79 | 1 | 2.3  |
| Lumican                                              | --     | -- | --  | 57.3  | 1 | 3.3  |
| Peroxiredoxin-2                                      | 33.95  | 1  | 5.6 | 56.08 | 1 | 5.6  |
| Insulin-like growth factor I                         | 27.64  | 1  | 9.8 | 55.97 | 1 | 7.8  |
| Cerebellin-1                                         | 38.3   | 1  | 3.6 | 55.2  | 1 | 3.6  |
| Neuronal PAS domain-containing protein 4             | 23.93  | 1  | 1.4 | 53.22 | 2 | 1.4  |
| Coagulation factor X                                 | 54.23  | 2  | 3.7 | 49.07 | 1 | 1.9  |
| G patch domain-containing protein 4                  | 26.56  | 1  | 2.2 | 49.01 | 2 | 2.2  |
| Cationic trypsin-3                                   | 52.33  | 1  | 3.2 | 48.54 | 1 | 3.2  |
| Phosphatidylinositol-glycan-specific phospholipase D | 267.76 | 6  | 8.1 | 46.26 | 1 | 1.3  |
| Attractin                                            | 49.93  | 1  | 0.7 | 45.94 | 1 | 0.7  |
| Exocyst complex component 3                          | 43.52  | 2  | 2.8 | 45.38 | 2 | 2.8  |
| Adenomatous polyposis coli protein                   | 29.48  | 1  | 0.2 | 45.21 | 2 | 0.6  |
| Lysozyme C-1 GN=Lyz1 PE=1 SV=2                       | --     | -- | --  | 45.03 | 1 | 4.7  |
| Selenocysteine insertion sequence-binding protein 2  | 51.2   | 2  | 0.8 | 43.8  | 2 | 0.8  |
| Histone H2B type 1                                   | --     | -- | --  | 41.36 | 1 | 7.2  |
| Carbonic anhydrase 2                                 | 30.82  | 1  | 3.8 | 37.59 | 1 | 3.8  |
| Apolipoprotein M                                     | 72.29  | 2  | 6.8 | 36.97 | 1 | 3.7  |
| N-acylneuraminase-9-phosphatase                      | --     | -- | --  | 36.39 | 1 | 3.2  |
| Complement C5 (Fragment)                             | --     | -- | --  | 34.71 | 1 | 19.5 |
| SUN domain-containing ossification factor            | --     | -- | --  | 34.27 | 1 | 0.7  |
| Phospholipase A2, membrane associated                | 48.42  | 1  | 5.5 | 33.9  | 1 | 4.8  |
| Serine/threonine-protein kinase 10                   | --     | -- | --  | 32.6  | 1 | 1.1  |
| Calpain-2 catalytic subunit                          | 28.32  | 1  | 1.1 | 32.42 | 1 | 1.1  |
| Vesicle-fusing ATPase                                | --     | -- | --  | 31.46 | 1 | 1.2  |
| Intraflagellar transport protein 172 homolog         | 31.27  | 1  | 0.7 | 31.21 | 1 | 0.7  |
| Dynamin-3                                            | 20.89  | 1  | 0.8 | 30.84 | 1 | 0.8  |

|                                                                |       |    |     |       |   |     |
|----------------------------------------------------------------|-------|----|-----|-------|---|-----|
| Enoyl-CoA hydratase domain-containing protein 3, mitochondrial | --    | -- | --  | 30.26 | 1 | 2.3 |
| Out at first protein homolog                                   | --    | -- | --  | 29.27 | 1 | 4.3 |
| Mannan-binding lectin serine protease 2                        | 55.03 | 2  | 4.1 | 28.68 | 1 | 1.9 |
| Regulated endocrine-specific protein 18                        | --    | -- | --  | 28.33 | 1 | 6.3 |
| Indoleamine 2,3-dioxygenase 1                                  | --    | -- | --  | 28.15 | 1 | 2.9 |
| Plexin-A3                                                      | --    | -- | --  | 27.93 | 1 | 0.4 |
| Fibronectin                                                    | 335.6 | 7  | 3.5 | 27.01 | 1 | 0.3 |
| Alcohol dehydrogenase [NADP(+)]                                | --    | -- | --  | 26.81 | 1 | 3.1 |
| Structural maintenance of chromosomes protein 3                | --    | -- | --  | 26.71 | 1 | 0.8 |
| E3 ubiquitin-protein ligase RNF8                               | --    | -- | --  | 26.56 | 1 | 1.4 |
| SAP domain-containing ribonucleoprotein                        | --    | -- | --  | 26.43 | 1 | 4.3 |
| Eukaryotic translation initiation factor 3 subunit A           | --    | -- | --  | 26.41 | 1 | 0.5 |
| Zinc finger protein DZIP1L                                     | --    | -- | --  | 26.33 | 1 | 1.7 |
| Thioredoxin-dependent peroxide reductase, mitochondrial        | --    | -- | --  | 26.08 | 1 | 2.7 |
| Pleiotropic regulator 1                                        | 23.2  | 1  | 2.1 | 25.5  | 1 | 2.1 |
| Keratin, type II cytoskeletal 80                               | --    | -- | --  | 25.34 | 1 | 2   |
| Insulin-like growth factor-binding protein 5                   | --    | -- | --  | 25.27 | 1 | 3   |
| Eukaryotic translation initiation factor 2-alpha kinase 1      | 20.29 | 1  | 1.1 | 25.27 | 1 | 1.1 |
| Protein FAM228A                                                | 35.53 | 1  | 3.3 | 25.06 | 1 | 3.3 |
| 3-hydroxybutyrate dehydrogenase type 2                         | --    | -- | --  | 24.84 | 1 | 4.5 |
| Polymerase I and transcript release factor                     | --    | -- | --  | 24.71 | 1 | 2.3 |
| Cell division cycle 5-like protein                             | 29.94 | 1  | 1.1 | 24.7  | 1 | 1.1 |
| Protein wntless homolog                                        | --    | -- | --  | 24.42 | 1 | 2.2 |
| Leucine-rich repeat-containing protein 63                      | 21.57 | 1  | 1.2 | 23.82 | 1 | 1.2 |
| Selenoprotein P                                                | 43.04 | 2  | 8.6 | 23.77 | 1 | 2.9 |
| Probable G-protein coupled receptor 158                        | --    | -- | --  | 23.62 | 1 | 0.7 |



|                                                                                    |       |    |     |       |   |     |
|------------------------------------------------------------------------------------|-------|----|-----|-------|---|-----|
| Splicing factor, suppressor of white-apricot homolog                               | --    | -- | --  | 23.44 | 1 | 1.5 |
| Microtubule-associated protein 2                                                   | --    | -- | --  | 23.37 | 1 | 0.5 |
| Vinculin                                                                           | --    | -- | --  | 23.31 | 1 | 1.2 |
| Microtubule-associated protein 1A                                                  | --    | -- | --  | 23.21 | 1 | 0.3 |
| Phosphorylase b kinase regulatory subunit alpha, skeletal muscle isoform           | --    | -- | --  | 22.91 | 1 | 0.6 |
| Brain-specific angiogenesis inhibitor 1-associated protein 2-like protein 1        | --    | -- | --  | 22.84 | 1 | 2.9 |
| Myosin-9                                                                           | --    | -- | --  | 22.84 | 1 | 0.5 |
| Annexin A1                                                                         | 21.21 | 1  | 2   | 22.78 | 1 | 2   |
| Membrane-associated phosphatidylinositol transfer protein 1                        | --    | -- | --  | 22.61 | 1 | 0.6 |
| Transmembrane protein 214                                                          | --    | -- | --  | 22.57 | 1 | 1   |
| Prostaglandin E2 receptor EP4 subtype                                              | --    | -- | --  | 22.52 | 1 | 1.8 |
| Gastrotropin                                                                       | --    | -- | --  | 22.52 | 1 | 7   |
| Dorsal root ganglia homeobox protein                                               | 23.05 | 1  | 4.2 | 22.47 | 1 | 4.2 |
| Sushi, von Willebrand factor type A, EGF and pentraxin domain-containing protein 1 | --    | -- | --  | 22.45 | 1 | 0.2 |
| Sperm-associated antigen 4 protein                                                 | 23.1  | 1  | 2.9 | 22.28 | 1 | 2.9 |
| Odorant-binding protein                                                            | --    | -- | --  | 22.13 | 1 | 4.7 |
| Perilipin-1                                                                        | --    | -- | --  | 22.08 | 1 | 1.7 |
| Voltage-dependent L-type calcium channel subunit beta-2                            | --    | -- | --  | 21.78 | 1 | 1.1 |
| Phosphatidylinositol 3,4,5-trisphosphate 5-phosphatase 1                           | --    | -- | --  | 21.6  | 1 | 0.6 |
| Putative E3 ubiquitin-protein ligase SH3RF2                                        | --    | -- | --  | 21.43 | 1 | 1   |
| Proline-rich protein 5                                                             | 21.92 | 1  | 1.8 | 21.13 | 1 | 1.8 |
| Homeobox protein Nkx-6.1                                                           | --    | -- | --  | 21    | 1 | 2.7 |
| Sodium-dependent serotonin transporter                                             | --    | -- | --  | 20.92 | 1 | 1.1 |

|                                                        |       |    |      |       |    |     |
|--------------------------------------------------------|-------|----|------|-------|----|-----|
| Nuclear pore complex protein Nup155                    | --    | -- | --   | 20.9  | 1  | 0.6 |
| Tropomyosin beta chain                                 | --    | -- | --   | 20.86 | 1  | 3.9 |
| Nidogen-2                                              | --    | -- | --   | 20.72 | 1  | 0.6 |
| Embryonic polyadenylate-binding protein 2              | --    | -- | --   | 20.61 | 1  | 3.7 |
| Cadherin EGF LAG seven-pass G-type receptor 3          | --    | -- | --   | 20.6  | 1  | 0.2 |
| Taste receptor type 1 member 1                         | --    | -- | --   | 20.42 | 1  | 1   |
| P2Y purinoceptor 12                                    | --    | -- | --   | 20.39 | 1  | 3.2 |
| Stromelysin-3                                          | --    | -- | --   | 20.33 | 1  | 2.2 |
| Structural maintenance of chromosomes protein 1A       | 20.93 | 1  | 0.6  | 20.33 | 1  | 0.6 |
| Calpain-8                                              | --    | -- | --   | 20.26 | 1  | 1   |
| Sodium-dependent glucose transporter 1                 | --    | -- | --   | 20.04 | 1  | 1.7 |
| Nucleolar protein 16                                   | --    | -- | --   | 20.03 | 1  | 5.1 |
| von Willebrand factor A domain-containing protein 3A   | 21.86 | 1  | 0.9  | --    | -- | --  |
| Long-chain-fatty-acid--CoA ligase ACSBG2               | 21.41 | 1  | 0.9  | --    | -- | --  |
| Sentrin-specific protease 7                            | 23.95 | 1  | 0.8  | --    | -- | --  |
| Phosphatidylinositol 4-phosphate 5-kinase type-1 alpha | 47.92 | 2  | 1.3  | --    | -- | --  |
| Leukemia inhibitory factor receptor                    | 47.31 | 1  | 0.7  | --    | -- | --  |
| Apolipoprotein C-III                                   | 26.25 | 1  | 23.8 | --    | -- | --  |
| A-kinase anchor protein SPHKAP                         | 21.98 | 1  | 0.5  | --    | -- | --  |
| Cytochrome P450 2D4                                    | 27    | 1  | 2.4  | --    | -- | --  |
| Proteasome subunit alpha type-1                        | 25.42 | 1  | 2.7  | --    | -- | --  |
| Choline O-acetyltransferase                            | 24.42 | 1  | 0.9  | --    | -- | --  |
| 60S ribosomal protein L13                              | 24.09 | 1  | 4.3  | --    | -- | --  |
| Inactive pancreatic lipase-related protein 1           | 28.78 | 1  | 3.6  | --    | -- | --  |
| Phospholipase A-2-activating protein                   | 33.94 | 1  | 1    | --    | -- | --  |
| Guanine nucleotide-binding protein G(o) subunit alpha  | 26.12 | 1  | 1.7  | --    | -- | --  |
| Tripartite motif-containing protein 26                 | 21.85 | 1  | 1.3  | --    | -- | --  |

|                                                                  |        |   |      |    |    |    |
|------------------------------------------------------------------|--------|---|------|----|----|----|
| Small conductance calcium-activated potassium channel protein 1  | 20.2   | 1 | 1.3  | -- | -- | -- |
| Neurofibromin                                                    | 42.23  | 1 | 0.2  | -- | -- | -- |
| Glycosylation-dependent cell adhesion molecule 1                 | 22.7   | 1 | 6.8  | -- | -- | -- |
| Unconventional myosin-Ib                                         | 35.81  | 1 | 0.4  | -- | -- | -- |
| Extracellular superoxide dismutase [Cu-Zn]                       | 65.76  | 1 | 6.6  | -- | -- | -- |
| Geranylgeranyl transferase type-2 subunit alpha                  | 20.79  | 1 | 1.8  | -- | -- | -- |
| Ligand-dependent nuclear receptor-interacting factor 1           | 22.69  | 1 | 0.8  | -- | -- | -- |
| Zinc finger RNA-binding protein                                  | 21.5   | 1 | 0.8  | -- | -- | -- |
| Importin subunit alpha-6                                         | 26.62  | 1 | 1.3  | -- | -- | -- |
| Large subunit GTPase 1 homolog                                   | 22.1   | 1 | 1.2  | -- | -- | -- |
| Vomer nasal type-1 receptor 98                                   | 22.11  | 1 | 2.5  | -- | -- | -- |
| Carboxylesterase 1E                                              | 159.9  | 3 | 11.4 | -- | -- | -- |
| Interleukin-1 receptor accessory protein                         | 50.56  | 1 | 1.8  | -- | -- | -- |
| Zinc-alpha-2-glycoprotein                                        | 133.19 | 2 | 7.8  | -- | -- | -- |
| Nuclear fragile X mental retardation-interacting protein 1       | 32.52  | 1 | 1.2  | -- | -- | -- |
| Dual specificity protein phosphatase 6                           | 24.35  | 1 | 1.6  | -- | -- | -- |
| Secernin-1                                                       | 23.04  | 1 | 1.9  | -- | -- | -- |
| Transcriptional adapter 2-alpha                                  | 35.81  | 1 | 1.1  | -- | -- | -- |
| Probable ribosome biogenesis protein RLP24                       | 24.57  | 1 | 4.3  | -- | -- | -- |
| Synaptosomal-associated protein 47                               | 46.8   | 1 | 1.7  | -- | -- | -- |
| Sodium leak channel non-selective protein                        | 33.14  | 1 | 0.3  | -- | -- | -- |
| Mortality factor 4-like protein 2                                | 26.57  | 1 | 2.1  | -- | -- | -- |
| Apolipoprotein B-100                                             | 79.26  | 2 | 0.7  | -- | -- | -- |
| Kinesin-like protein KIF15                                       | 44.73  | 1 | 0.4  | -- | -- | -- |
| Transient receptor potential cation channel subfamily M member 7 | 22.34  | 1 | 0.3  | -- | -- | -- |

---

<sup>1</sup> Score: number which reflects the combined scores of all observed mass spectra that can be matched to amino acid sequences within that protein. A higher score indicates a more confident match.

<sup>2</sup> Num. Pept: Number of peptides detected for each protein identified.

<sup>3</sup> Coverage: Percentage of the database protein sequence covered by matching peptide.

**Table S3.** Proteins identified by mass spectrometry grouped according to their molecular function using UniProt database. Only proteins detected with minimum 2 peptides were considered.

| Proteins                            | NP-DMSA     |             | NP-PEG-(NH <sub>2</sub> ) <sub>2</sub> (2000) |             |
|-------------------------------------|-------------|-------------|-----------------------------------------------|-------------|
|                                     | Soft corona | Hard corona | Soft corona                                   | Hard corona |
| <b>Immunoglobulins</b>              |             |             |                                               |             |
| . Ig kappa chain C region, B allele | x           | x           | x                                             | x           |
| . Ig kappa chain C region, A allele | -           | -           | x                                             | x           |
| . Ig gamma-1 chain C region         | x           | -           | x                                             | -           |
| . Ig gamma-2B chain C region        | x           | x           | x                                             | x           |
| . Ig gamma-2A chain C region        | x           | -           | x                                             | -           |
| . Ig heavy chain V region IR2       | -           | -           | x                                             | x           |
| . Ig gamma-2C chain C               | x           | x           | x                                             | x           |
| <b>Lipoproteins</b>                 |             |             |                                               |             |
| . Apolipoprotein A-IV               | x           | x           | x                                             | x           |
| . Apolipoprotein E                  | x           | x           | x                                             | x           |
| . Clusterin                         | x           | x           | x                                             | x           |
| . Apolipoprotein A-I                | x           | x           | x                                             | x           |
| . Apolipoprotein M                  | x           | x           | x                                             | -           |
| . Apolipoprotein A-II               | x           | x           | x                                             | x           |

|                         |   |   |   |   |
|-------------------------|---|---|---|---|
| . Apolipoprotein B-100  | x | x | x | - |
| . Beta-2-glycoprotein 1 | x | x | x | x |
| . Apolipoprotein C-I    | x | x | x | x |
| . Apolipoprotein C-IV   | x | x | x | x |

### Coagulation

|                                    |   |   |   |   |
|------------------------------------|---|---|---|---|
| . Coagulation factor X             | x | x | x | - |
| . Vitamin K-dependent protein S    | - | x | x | x |
| . Angiotensinogen                  | x | x | x | x |
| . Fibrinogen alpha chain           | - | x | - | x |
| . Coagulation factor IX (Fragment) | x | x | - | x |
| . T-kininogen 2                    | x | x | x | x |
| . T-kininogen 1                    | x | x | x | x |
| . Prothrombin                      | x | x | x | x |
| . Kininogen-1                      | x | x | x | x |
| . Heparin cofactor 2               | x | x | x | x |
| . Coagulation factor XII           | x | x | x | x |
| . Histidine-rich glycoprotein      | x | x | x | x |
| . Plasma kallikrein                | x | x | x | x |
| . Platelet factor 4                | x | x | x | x |
| . Plasminogen                      | x | x | x | x |

### Complement pathway

|                               |   |   |   |   |
|-------------------------------|---|---|---|---|
| . Complement C1s subcomponent | - | x | - | x |
|-------------------------------|---|---|---|---|

|                                         |   |   |   |   |
|-----------------------------------------|---|---|---|---|
| . C4b-binding protein beta chain        | - | x | - | x |
| . Complement component C9               | x | x | x | x |
| . Plasma protease C1 inhibitor          | x | x | x | x |
| . Complement C3                         | x | x | x | x |
| . Complement component C6               | x | x | x | x |
| . Complement factor D                   | - | x | x | x |
| . Complement C4                         | x | x | x | x |
| . Complement factor I                   | x | x | x | x |
| . Complement component C8 beta chain    | x | x | x | x |
| . Complement C1q subcomponent subunit C | - | x | - | x |
| . Complement C1q subcomponent subunit B | x | x | - | x |
| . Complement C1q subcomponent subunit A | - | x | x | x |
| . C-reactive protein                    | x | x | x | x |
| . Mannose-binding protein C             | - | x | - | - |
| . Mannose-binding protein A             | - | - | x | x |
| <b>Cellular Component</b>               |   |   |   |   |
| . Keratin, type I cytoskeletal 13       | - | x | - | x |
| . Keratin, type I cytoskeletal 14       | - | x | - | x |
| . Keratin, type I cytoskeletal 15       | - | x | x | x |
| . Keratin, type I cytoskeletal 17       | - | x | - | x |
| . Keratin, type I cytoskeletal 19       | - | x | - | x |
| . Keratin, type I cytoskeletal 20       | - | x | - | x |

|                                             |   |   |   |   |
|---------------------------------------------|---|---|---|---|
| . Keratin, type I cytoskeletal 42           | - | x | - | x |
| . Keratin, type II cytoskeletal 1           | x | x | x | x |
| . Keratin, type II cytoskeletal 1b          | - | x | - | x |
| . Keratin, type II cytoskeletal 5           | - | x | - | x |
| . Keratin, type II cytoskeletal 4           | - | x | - | x |
| . Keratin, type II cytoskeletal 8           | - | x | - | x |
| . Keratin, type II cytoskeletal 2 epidermal | - | x | x | x |
| . Keratin, type II cytoskeletal 6A          | - | x | x | x |
| . Keratin, type II cytoskeletal 73          | - | x | - | x |
| . Keratin, type II cytoskeletal 75          | - | x | - | x |
| . Actin, cytoplasmic 1                      | x | x | x | x |
| . Fibronectin                               | x | x | x | - |
| . Junction plakoglobin                      | - | - | - | x |
| . Gelsolin                                  | x | x | x | x |
| <b>Transport</b>                            |   |   |   |   |
| . Serum albumin                             | x | x | x | x |
| . Serotransferrin                           | x | x | x | x |
| . Hemopexin                                 | x | x | x | x |
| . Hemoglobin subunit alpha-1/2              | x | x | x | x |
| . Hemoglobin subunit beta-1                 | x | x | x | x |
| . Hemoglobin subunit beta-2                 | x | x | x | x |
| . Ceruloplasmin                             | x | x | x | x |



|                                                          |   |   |   |   |
|----------------------------------------------------------|---|---|---|---|
| . Haptoglobin                                            | x | x | x | x |
| . Corticosteroid-binding globulin                        | x | x | x | x |
| . Exocyst complex component 3                            | - | x | - | x |
| <b>Enzymes</b>                                           |   |   |   |   |
| . Serum paraoxonase/arylesterase 1                       | x | x | x | x |
| . Carboxylesterase 1C                                    | x | x | x | x |
| . Carboxylesterase 1E                                    | - | x | x | - |
| . Mannan-binding lectin serine protease 2                | - | x | - | - |
| . Carboxypeptidase Q                                     | - | - | x | - |
| . Phosphatidylcholine-sterol acyltransferase             | - | - | x | - |
| . Phosphatidylinositol-glycan-specific phospholipase D   | x | x | x | - |
| . Glyceraldehyde-3-phosphate dehydrogenase               | - | x | x | x |
| . Glutathione peroxidase 3                               | x | x | x | x |
| . Carboxypeptidase N catalytic chain                     | x | x | x | x |
| . Carboxypeptidase B2                                    | x | x | x | x |
| . Phosphatidylinositol 4-phosphate 5-kinase type-1 alpha | - | x | - | - |
| . Ribonuclease 4                                         | - | - | - | x |
| <b>Protease inhibitor</b>                                |   |   |   |   |
| . Serine protease inhibitor A3K                          |   |   |   |   |
| . Serine protease inhibitor A3L                          | x | x | x | x |
| . Serine protease inhibitor A3N                          | x | x | x | x |

|                                                       |   |   |   |   |
|-------------------------------------------------------|---|---|---|---|
| . Serine protease inhibitor A3M                       | x | x | x | x |
| . Alpha-2-macroglobulin                               | x | x | x | x |
| . Inter-alpha-trypsin inhibitor heavy chain H3        | x | - | x | - |
| . Metalloproteinase inhibitor 3                       | x | x | x | x |
| . Protein Z-dependent protease inhibitor              | - | x | - | x |
| . Glia-derived nexin                                  | x | x | x | - |
|                                                       | - | - | - | x |
| <b>Nucleic acid binding</b>                           |   |   |   |   |
| . Histone H2A type 1-C                                |   |   |   |   |
| . Histone H3.1                                        | - | - | - | x |
| . Histone H4                                          | - | - | - | x |
| . Chromodomain-helicase-DNA-binding protein 6         | - | - | - | x |
| . G patch domain-containing protein 4                 | x | - | - | - |
| . Neuronal PAS domain-containing protein 4            | - | - | - | x |
| . Selenocysteine insertion sequence-binding protein 2 | - | - | x | x |
|                                                       | - | x | - | x |
| <b>Antioxidant</b>                                    | - | x | - | x |
| . Selenoprotein P                                     |   |   |   |   |
|                                                       | - | x | x | - |
| <b>Receptor</b>                                       |   |   |   |   |
| . Leukemia inhibitory factor receptor                 |   |   |   |   |
| . Interleukin-1 receptor accessory protein            | - | - | x | - |
|                                                       | x | - | - | - |

**Other Serum components**

|                                                                          |   |   |   |   |
|--------------------------------------------------------------------------|---|---|---|---|
| . Serum amyloid P-component                                              | x | x | x | x |
| . Alpha-1-acid glycoprotein                                              | x | x | x | x |
| . Vitamin D-binding protein                                              | x | x | x | x |
| . Murinoglobulin-1                                                       | x | x | x | x |
| . Retinol-binding protein 4                                              | x | x | x | x |
| . Alpha-1-antiproteinase                                                 | x | x | x | x |
| . Alpha-1-inhibitor 3                                                    | x | x | x | x |
| . Transthyretin                                                          | x | x | x | x |
| . Protein AMBP                                                           | x | x | x | x |
| . Major urinary protein                                                  | x | - | x | x |
| . Zinc-alpha-2-glycoprotein                                              | x | x | x | - |
| . Afamin                                                                 | x | x | x | x |
| . Insulin-like growth factor-binding protein complex acid labile subunit | x | x | x | x |
| . Alpha-2-HS-glycoprotein                                                | x | x | x | x |
| . Murinoglobulin-2                                                       | x | x | x | x |
| . Insulin-like growth factor-binding protein 3                           | - | - | - | x |
| . Extracellular matrix protein 1                                         | x | x | x | x |
| . Alpha-1-macroglobulin                                                  | x | x | x | x |
| . Fetuin-B                                                               | x | x | x | x |

---

|                                      |   |   |   |   |
|--------------------------------------|---|---|---|---|
| • Alpha-1B-glycoprotein              | x | x | x | x |
| • Attractin                          | x | - | x | - |
| • Beta-2-microglobulin               | x | x | x | x |
| • Lipopolysaccharide-binding protein | - | - | - | x |

---

**Gel 1. 50 mM HEPES 0.1% OGP, pH 7**

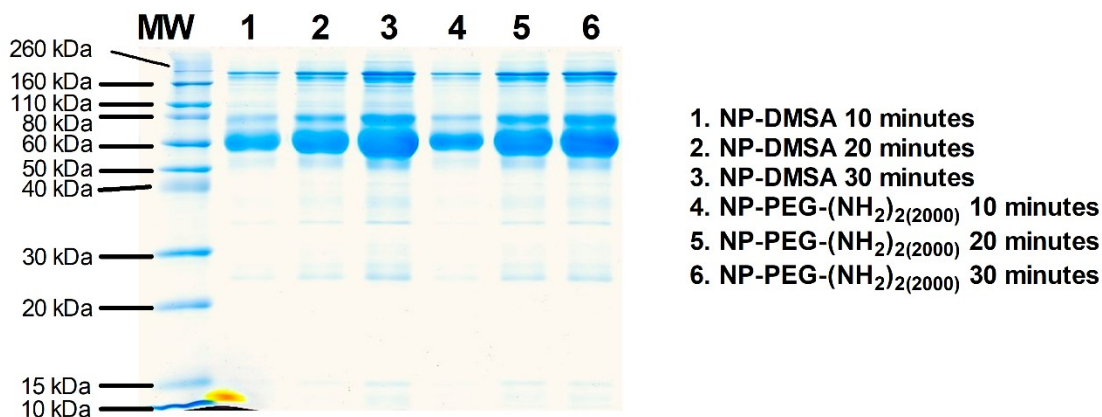

**Gel 2. 100 mM NaAc 0.1% OGP, pH 5**

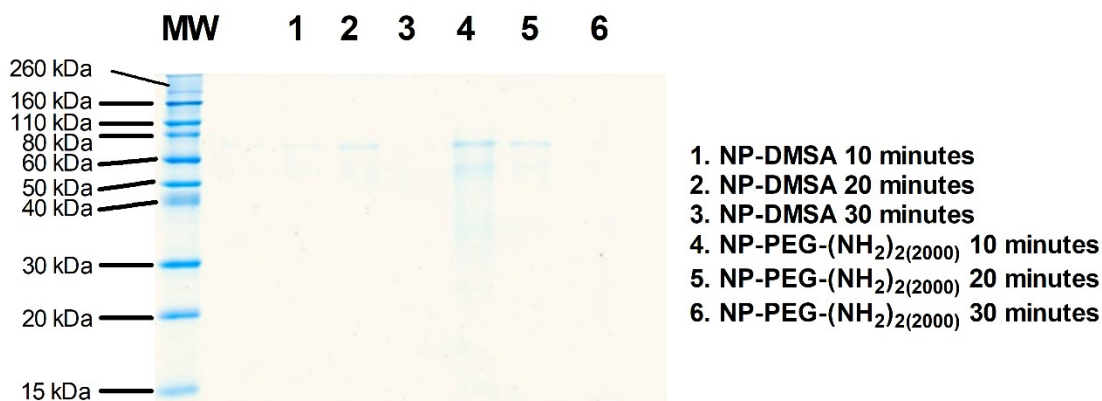

Figure S1. Coomassie blue-stained gels after electrophoresis SDS-PAGE (gel 10%). Proteins from particles incubated at 10, 20 and 30 min at 37 °C were eluted sequentially with buffers at different pH. Top panel: Proteins eluted after incubation in buffer 50 mM HEPES 0.1% OGP, pH 7 (soft corona). Lower panel: Proteins eluted after incubation in buffer 100 mM NaAc 0.1% OGP, pH 5 (hard corona).

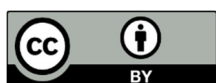

© 2019 by the authors. Submitted for possible open access publication under the terms and conditions of the Creative Commons Attribution (CC BY) license (<http://creativecommons.org/licenses/by/4.0/>).
